# Supplementary material for: The study of a novel cobalt-implanted pyridylporphyrin/graphene oxide nanohybrid for enhanced photocatalytic hydrogen evolution and its electron transfer mechanism
Source: Royal Society of Chemistry journal article supplement (doi:10.1039/c8nr06138f), 2018-01-01
Supplement: c8nr06138f1.pdf [file c8nr06138f1.pdf]

## Supporting information for

### **A novel cobalt implanted pyridylporphyrin/graphene oxide nanohybrid for enhanced photocatalytic hydrogen evolution and its electron transfer mechanism**

Kun Zhu,<sup>1a</sup> Qiang Luo,<sup>1a</sup> Shi-Zhao Kang,<sup>a</sup> Lixia Qin,<sup>a</sup> Guodong Li<sup>b</sup> and Xiangqing Li<sup>\*a</sup>

<sup>a</sup>School of Chemical and Environmental Engineering, Center of Graphene Research, Shanghai Institute of Technology, 100 Haiquan Road, Shanghai 201418, China

<sup>b</sup>State Key Laboratory of Inorganic Synthesis and Preparative Chemistry, College of Chemistry, Jilin University, Changchun 130012, China.

\*E-mail: xqli@sit.edu.cn (Xiangqing Li).

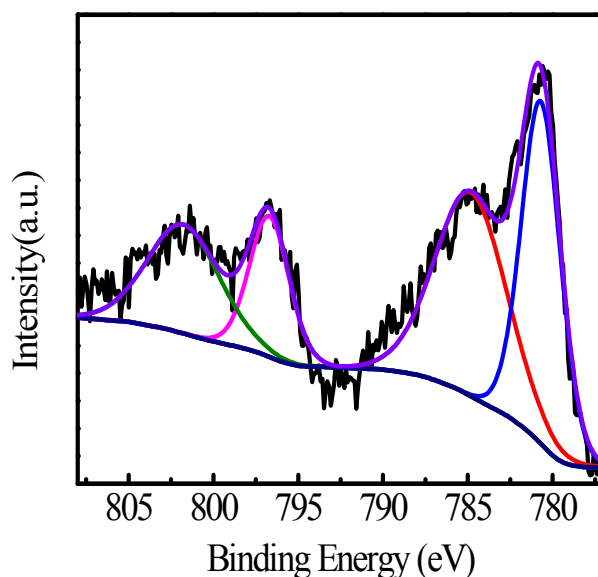

**Fig. S1.** High resolution XPS spectrum of Co2p for GO-Co<sup>2+</sup>-DPyP.

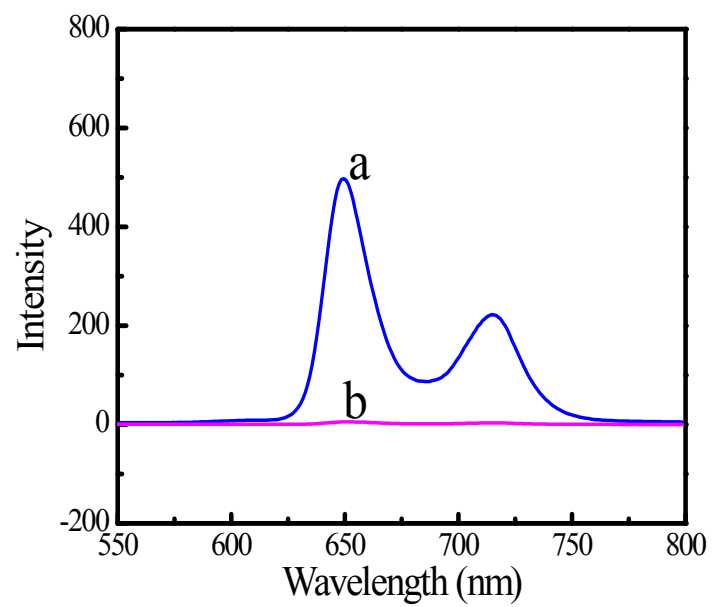

**Fig. S2.** Fluorescence spectra of the GO-Co<sup>2+</sup>-DPyP (a) and GO-Co-DPyP (b).  $\lambda_{\text{ex}} = 420$  nm.
